# Supplementary material for: Dynamics of Tree outside Forest Land Cover Development and Ecosystem Carbon Storage Change in Eastern Coastal Zone, Bangladesh
Source: MDPI journal article supplement (doi:10.3390/land11010076), 2022-01-04
Supplement: s1 [file s1]

## Supplementary information

Table S1. List of the satellite imageries used in this study.

| Landsat sensor name | Path/Row                     | Acquisition date | Spatial Resolution (m) | Used bands |
|---------------------|------------------------------|------------------|------------------------|------------|
| TM4-5               | 135/46,<br>136/44,<br>136/45 | February 1988    | 30                     | 1-5,7      |
| TM4-5               |                              | February 1998    | 30                     | 1-5,7      |
| TM4-5               |                              | February 2008    | 30                     | 1-5,7      |
| 8 OLI and TIRS      |                              | February 2018    | 30                     | 1-7,9      |

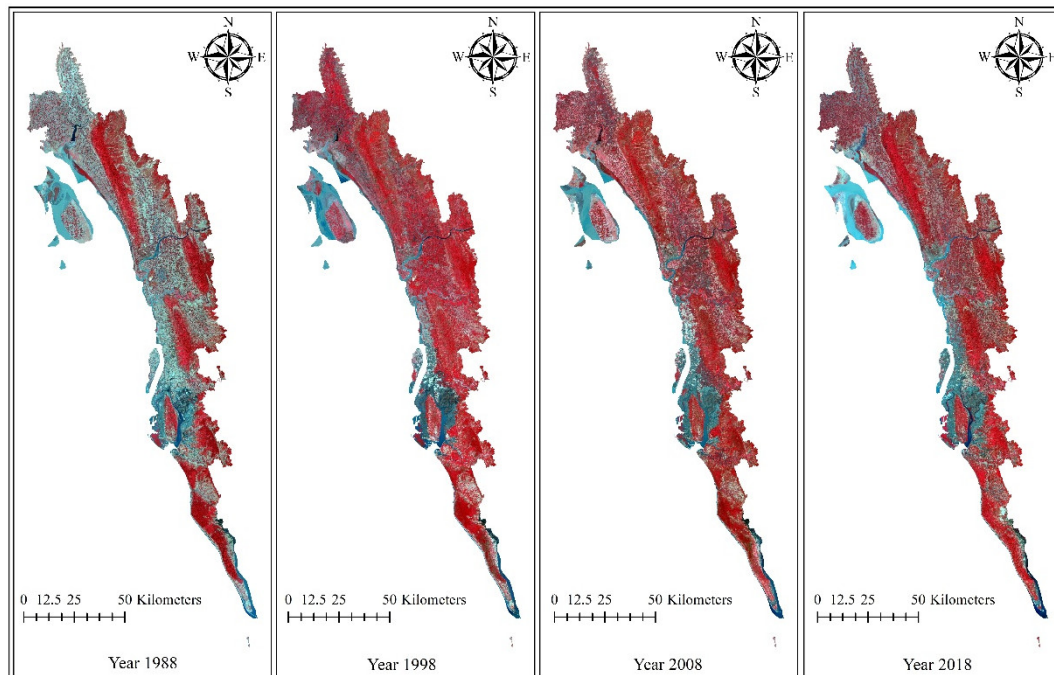

Figure S1. Multiband Landsat image of eastern coastal zone of Bangladesh.

Table S2. Classification accuracy of different land classes for 1988, 1998, 2008, and 2018.

| LULC class             | 1988        |         |       | 1998        |         |       | 2008        |         |       | 2018        |         |       |
|------------------------|-------------|---------|-------|-------------|---------|-------|-------------|---------|-------|-------------|---------|-------|
|                        | Producer' s | User' s | Kappa |
| Agricultural land      | 0.99        | 0.94    | 0.95  | 0.96        | 0.96    | 0.96  | 0.96        | 0.83    | 0.83  | 0.99        | 0.97    | 0.97  |
| Tree outside of forest | 0.95        | 0.71    | 0.70  | 0.91        | 0.71    | 0.71  | 0.67        | 0.69    | 0.69  | 0.99        | 0.97    | 0.97  |
| Mangrove               | 0.97        | 0.98    | 0.99  | 0.94        | 0.94    | 0.94  | 0.74        | 0.41    | 0.41  | 0.98        | 0.99    | 0.99  |
| Mudflat                | 0.91        | 0.88    | 0.87  | 0.99        | 0.99    | 0.99  | 0.92        | 0.93    | 0.93  | 0.98        | 0.99    | 0.99  |
| Built-up               | 0.92        | 0.97    | 0.98  | 0.98        | 0.94    | 0.94  | 0.99        | 0.97    | 0.97  | 0.99        | 0.97    | 0.97  |
| Waterbody              | 0.98        | 0.99    | 0.99  | 0.99        | 0.99    | 0.99  | 0.98        | 0.97    | 0.96  | 0.99        | 1       | 1     |
| Saltpan-shrimp         | 0.97        | 0.76    | 0.76  | 0.98        | 0.98    | 0.98  | 0.87        | 0.91    | 0.89  | 1           | 0.97    | 0.97  |
| Hill vegetation        | 0.98        | 0.99    | 0.98  | 0.99        | 0.99    | 0.99  | 0.95        | 0.99    | 0.98  | 0.99        | 0.99    | 0.99  |
| Overall accuracy       |             |         | 0.98  |             |         | 0.99  |             |         | 0.94  |             |         | 0.99  |
| Overall kappa          |             |         | 0.97  |             |         | 0.99  |             |         | 0.91  |             |         | 0.99  |

Table S3. LULC transition matrix.

| 1988-1998 (ha)        | Agriculture | TOF       | Mangrove | Mudflat  | Built-up | Waterbody | Saltpan-shrimp | Hill vegetation | Loss      | Net change |
|-----------------------|-------------|-----------|----------|----------|----------|-----------|----------------|-----------------|-----------|------------|
| Agriculture           | 337847.22   | 60747.66  | 808.83   | 2821.95  | 1235.88  | 6531.75   | 7988.58        | 28881           | 109015.65 | -26960     |
| TOF                   | 36653.58    | 34610.85  | 32.76    | 9.63     | 599.94   | 402.21    | 60.75          | 2952.63         | 40711.5   | 37608      |
| Mangrove              | 1810.98     | 15.84     | 4096.17  | 880.65   | 0        | 1300.5    | 175.5          | 3.24            | 4186.71   | -1496      |
| Mudflat               | 4125.69     | 11.97     | 1422     | 8817.84  | 5.58     | 10039.05  | 1003.77        | 0               | 16608.06  | -5976      |
| Built-up              | 423.54      | 62.46     | 0        | 9.99     | 1528.11  | 5.4       | 0.18           | 2.7             | 504.27    | 1377       |
| Waterbody             | 7771.14     | 709.02    | 398.79   | 6824.25  | 37.89    | 38458.71  | 2273.13        | 97.83           | 18112.05  | 1629       |
| Saltpan-shrimp        | 2295.09     | 57.87     | 23.49    | 75.87    | 0        | 1378.35   | 13121.64       | 4.41            | 3835.08   | 7668       |
| Hill vegetation       | 28975.86    | 16714.98  | 4.5      | 9.99     | 1.53     | 83.97     | 0.81           | 119126.88       | 45791.64  | -13850     |
| Gain                  | 82055.88    | 78319.8   | 2690.37  | 10632.3  | 1880.82  | 19741.23  | 11502.72       | 31941.81        |           |            |
| <b>1998-2008 (ha)</b> |             |           |          |          |          |           |                |                 |           |            |
| Agriculture           | 290198.16   | 88155.54  | 1412.19  | 2535.93  | 2717.91  | 4543.02   | 9568.44        | 20771.91        | 129704.94 | -43216.38  |
| TOF                   | 43281.54    | 57027.15  | 6.84     | 26.46    | 727.2    | 295.83    | 59.13          | 11506.5         | 55903.5   | 47564.73   |
| Mangrove              | 1107.45     | 33.39     | 4068.54  | 579.42   | 0        | 680.85    | 314.37         | 2.52            | 2718      | 1084.95    |
| Mudflat               | 6035.85     | 217.53    | 1215.9   | 8297.28  | 32.13    | 3327.3    | 323.91         | 0.27            | 11152.89  | 1865.79    |
| Built-up              | 320.94      | 184.32    | 0        | 6.57     | 2886.66  | 9.72      | 0.72           | 0               | 522.27    | 3013.74    |
| Waterbody             | 4807.8      | 510.84    | 1149.48  | 9784.53  | 41.22    | 38208.87  | 3651.21        | 45.99           | 19991.07  | -10538.64  |
| Saltpan-shrimp        | 2074.77     | 57.15     | 18.18    | 79.02    | 0.54     | 557.46    | 21837.24       | 0               | 2787.12   | 11130.93   |
| Hill vegetation       | 28860.21    | 14309.46  | 0.36     | 6.75     | 17.01    | 38.25     | 0.27           | 107836.38       | 43232.31  | -10905.12  |
| Gain                  | 86488.56    | 103468.23 | 3802.95  | 13018.68 | 3536.01  | 9452.43   | 13918.05       | 32327.19        |           |            |
| <b>2008-2018 (ha)</b> |             |           |          |          |          |           |                |                 |           |            |
| Agriculture           | 243620.82   | 89108.01  | 1187.37  | 2427.93  | 4598.28  | 4877.55   | 8782.02        | 22084.83        | 133065.99 | -58409.82  |
| TOF                   | 47947.32    | 102135.42 | 33.03    | 159.03   | 2455.74  | 619.47    | 460.98         | 6684.39         | 58359.96  | 60219.72   |
| Mangrove              | 1270.44     | 119.88    | 5460.48  | 358.65   | 0        | 534.33    | 127.71         | 0               | 2411.01   | 635.31     |
| Mudflat               | 3599.82     | 93.96     | 369.36   | 8867.7   | 90.63    | 8130.33   | 160.38         | 3.78            | 12448.26  | -4082.58   |
| Built-up              | 601.83      | 370.62    | 0        | 6.03     | 5397.66  | 37.08     | 1.17           | 8.28            | 1025.01   | 7128.45    |
| Waterbody             | 3959.55     | 521.64    | 1223.19  | 5303.97  | 123.75   | 34598.07  | 1897.2         | 33.93           | 13063.23  | 2717.28    |
| Saltpan-shrimp        | 5858.19     | 122.4     | 232.65   | 109.62   | 6.03     | 1496.7    | 27929.7        | 0               | 7825.59   | 3607.74    |
| Hill vegetation       | 11419.02    | 28243.17  | 0.72     | 0.45     | 879.03   | 85.05     | 3.87           | 99532.26        | 40631.31  | -11816.1   |
| Gain                  | 74656.17    | 118579.68 | 3046.32  | 8365.68  | 8153.46  | 15780.51  | 11433.33       | 28815.21        |           |            |
